# Supplementary material for: Formal modeling and analysis of the hexosamine biosynthetic pathway: role of O-linked N-acetylglucosamine transferase in oncogenesis and cancer progression
Source: PubMed Central journal article supplement (PMC5047222; doi:10.7717/peerj.2348), 2016-09-27

# LEGEND

**Order of Qualitative States:** NFKB,P21,FoXM1,PI3K,P53,MDM2,OGT,OGA,CMyc

**Start State:** 100000100

**Deadlock State:** 101111101

Betweenness Centrality

Less

More

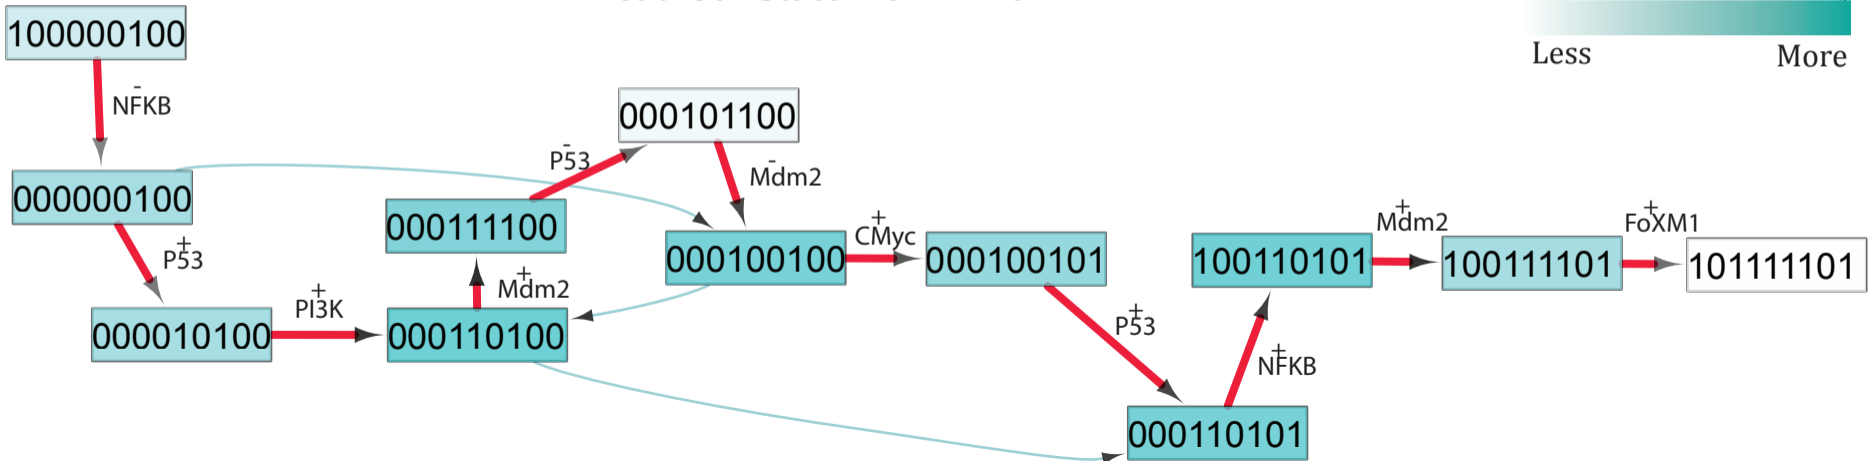

Supplement: peerj-04-2348-s009.pdf [file peerj-04-2348-s009.pdf]
