# Supplementary material for: Formal modeling and analysis of the hexosamine biosynthetic pathway: role of O-linked N-acetylglucosamine transferase in oncogenesis and cancer progression
Source: PubMed Central journal article supplement (PMC5047222; doi:10.7717/peerj.2348), 2016-09-27

# LEGEND

Order of Qualitative States: NFKB,P21,FoXM1,PI3K,P53,MDM2,OGT,OGA,CMyc

Start State: 100000100

Deadlock State: 10111101

Betweenness Centrality

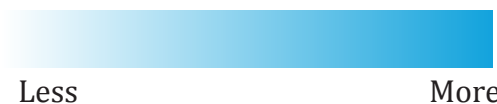

A.

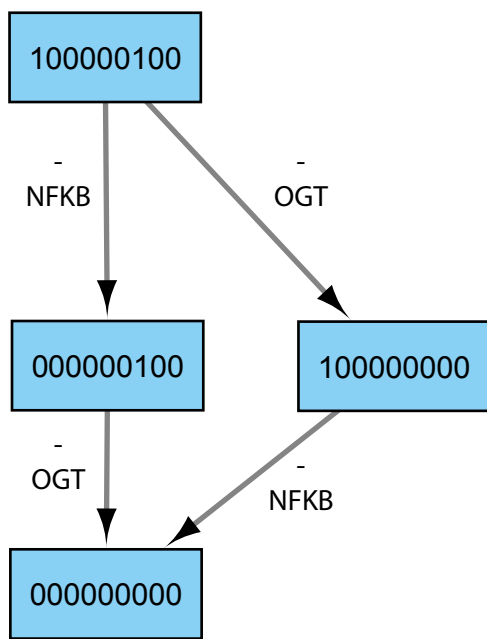

B.

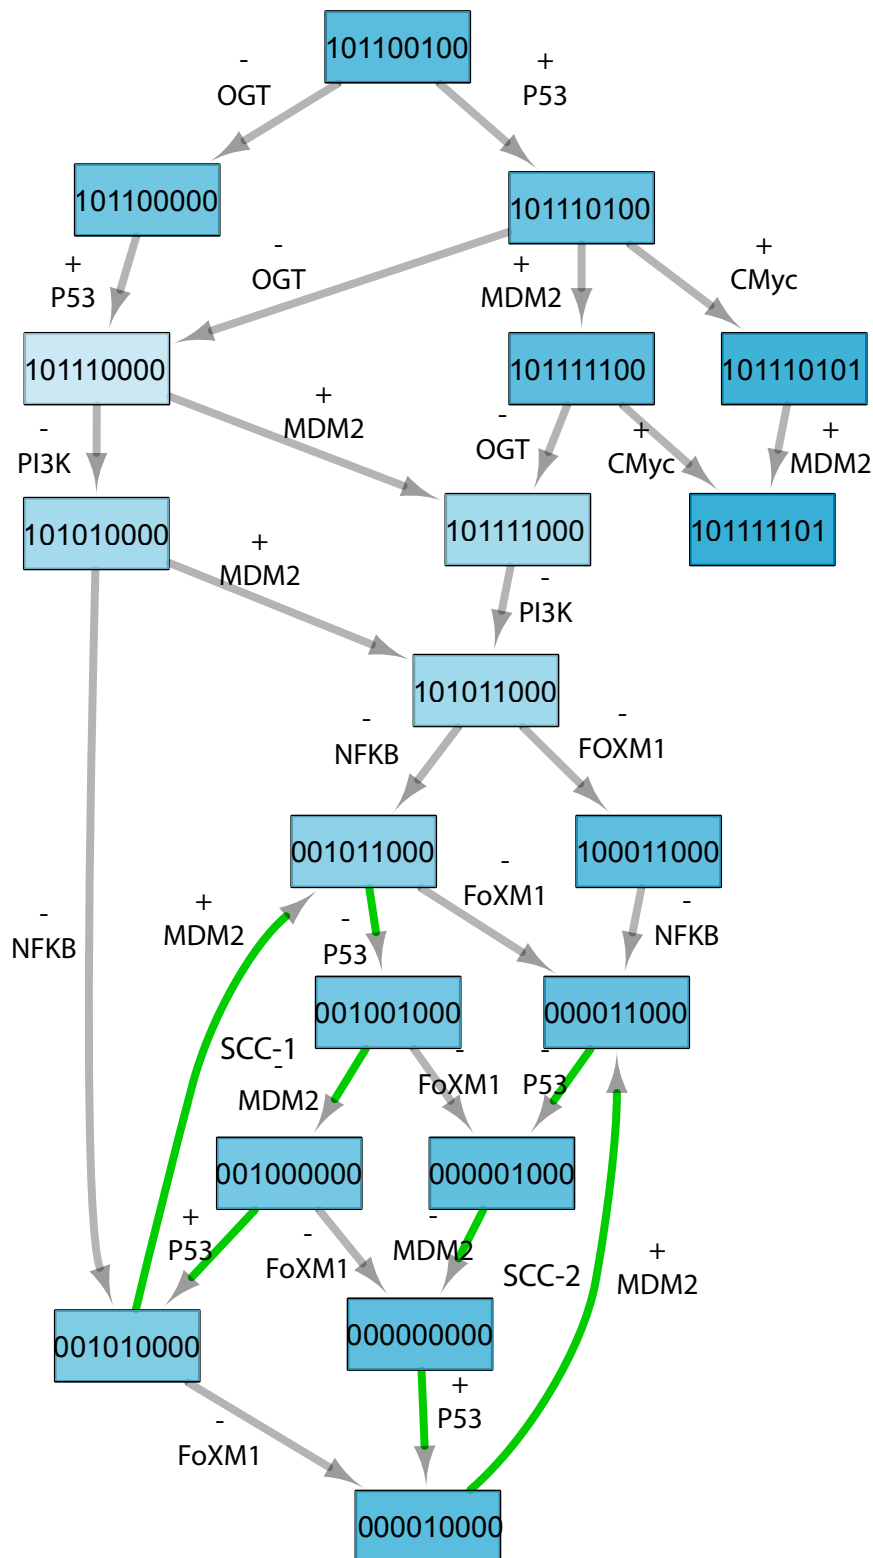

C.

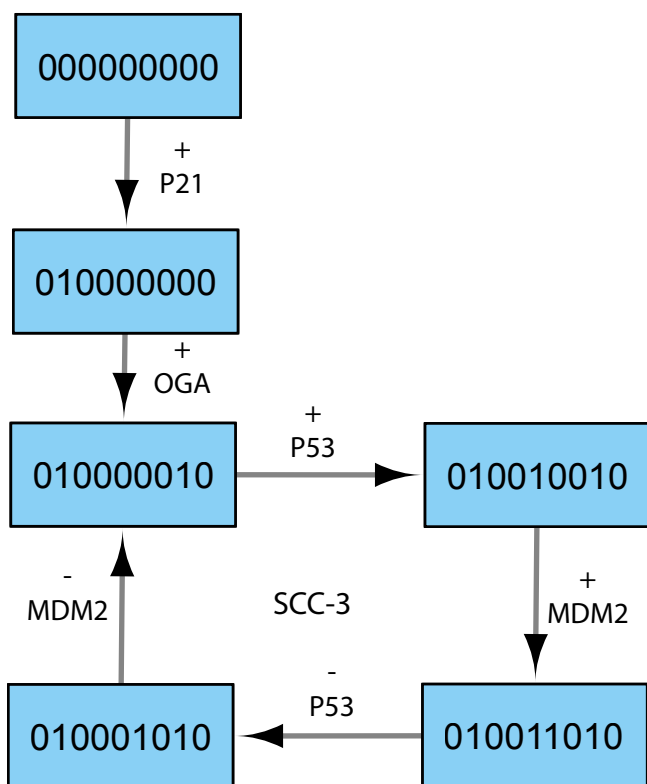

Supplement: peerj-04-2348-s010.pdf [file peerj-04-2348-s010.pdf]
