# Supplementary material for: Formal modeling and analysis of the hexosamine biosynthetic pathway: role of O-linked N-acetylglucosamine transferase in oncogenesis and cancer progression
Source: PubMed Central journal article supplement (PMC5047222; doi:10.7717/peerj.2348), 2016-09-27
Supplement: peerj-04-2348-s011.pdf [file peerj-04-2348-s011.pdf]

Table 1: The software/Tools used in this study (along with the Download links)

| Method               | Tools     | Link                                                                                                                                  |
|----------------------|-----------|---------------------------------------------------------------------------------------------------------------------------------------|
| Qualitative Modeling | GinSim    | <a href="http://ginsim.org/">http://ginsim.org/</a>                                                                                   |
|                      | GenoTech  | <a href="http://mac.softpedia.com/get/Math-Scientific/Genotech.shtml">http://mac.softpedia.com/get/Math-Scientific/Genotech.shtml</a> |
| Parameter Estimation | SMBioNet  | <a href="http://www.i3s.unice.fr/~richard/smbionet/">http://www.i3s.unice.fr/~richard/smbionet/</a>                                   |
| Network Analysis     | Cytoscpae | <a href="http://www.cytoscape.org/">http://www.cytoscape.org/</a>                                                                     |
| Hybrid Modeling      | HyTECH    | <a href="https://embedded.eecs.berkeley.edu/research/hytech/">https://embedded.eecs.berkeley.edu/research/hytech/</a>                 |
