# Supplementary material for: Formal modeling and analysis of the hexosamine biosynthetic pathway: role of O-linked N-acetylglucosamine transferase in oncogenesis and cancer progression
Source: PeerJ. 2016 Sep 27;4:e2348. doi: 10.7717/peerj.2348 (PMC5047222; doi:10.7717/peerj.2348)
Supplement: Supplemental Information 3 — Comparison of parameter values and set of selected parameters are highlighted. [file peerj-04-2348-s003.xlsx]

## Sheet: Sheet2
Parameters\Models	1	2	3	4
NFKB
K_NFKB	0	0	0	0
K_NFKB+P21	0	0	0	0
K_NFKB+PI3K	0	0	0	0		SMBioNet Selects 4 models in which 38 out of 40 parameters are fixed. The remaining two parameter (i.e. Kp21{FoXm1+p53} and Kp21{p53+PI3K}) lead to 4 combinations shown in Row 29 & 30. The final selected parameter combination used for state graph generation is highlighted. The selection has been made on the basis of experimental observations which suggest that p21 is expressed in the prescence of…
K_NFKB+P21+PI3K	1	1	1	1
PI3K
K_PI3K	0	0	0	0
K_PI3K+NFKB	0	0	0	0
K_PI3K+OGT	1	1	1	1
K_PI3K+P53	0	0	0	0
K_PI3K+NFKB+OGT	1	1	1	1
K_PI3K+OGT+P53	1	1	1	1
K_PI3K+NFKB+P53	1	1	1	1
K_PI3K+NFKB+OGT+P53	1	1	1	1
OGA
K_OGA	0	0	0	0
K_OGA+OGT	1	1	1	1
P53
K_P53	0	0	0	0
K_P53+MDM2	1	1	1	1
K_P53+NFKB	1	1	1	1
K_P53+MDM2+NFKB	1	1	1	1
P21
K_P21	0	0	0	0
K_P21+FOXM	0	0	0	0
K_P21+P53	0	0	0	0
K_P21+PI3K	0	0	0	0
K_P21+FOXM+P53	0	1	0	1
K_P21+P53+PI3K	0	0	1	1
K_P21+FOXM+PI3K	1	1	1	1
K_P21+FOXM+P53+PI3K	1	1	1	1
FOXM1
K_FOXM	0	0	0	0
K_FOXM+P53	0	0	0	0
K_FOXM+PI3K	1	1	1	1
K_FOXM+P53+PI3K	1	1	1	1
OGT
K_OGT	0	0	0	0
K_OGT+CMyc	1	1	1	1
K_OGT+OGA	0	0	0	0
K_OGT+CMyc+OGA	1	1	1	1
MDM2
K_MDM2	0	0	0	0
K_MDM2+P53	1	1	1	1
CMyc
K_CMyc	0	0	0	0
K_CMyc+OGT	1	1	1	1
K_CMyc+P53	0	0	0	0
K_CMyc+OGT+P53	1	1	1	1
